# Supplementary material for: The corneal subbasal nerve plexus and thickness of the retinal layers in pediatric type 1 diabetes and matched controls
Source: PubMed Central journal article supplement (PMC5758564; doi:10.1038/s41598-017-18284-z), 2018-01-08
Supplement: 41598_2017_18284_MOESM1_ESM.pdf [file 41598_2017_18284_MOESM1_ESM.pdf]

The corneal subbasal nerve plexus and thickness of the retinal layers in pediatric type 1 diabetes and matched controls

Aline Götze<sup>1§</sup>, Sophie von Keyserlingk<sup>2§</sup>, Sabine Peschel<sup>1</sup>, Ulrike Jacoby<sup>2</sup>, Corinna Schreiver<sup>2</sup>, Bernd Köhler<sup>3</sup>, Stephan Allgeier<sup>3</sup>, Karsten Winter<sup>4</sup>, Martin Röhlig<sup>5</sup>, Anselm Jünemann<sup>1</sup>, Rainer Guthoff<sup>6</sup>, Oliver Stachs<sup>1#</sup>, and Dagmar-C. Fischer<sup>2##</sup>

§,# these authors contributed equally to this work

<sup>1</sup>Department of Ophthalmology, Rostock University Medical Center, Rostock, Germany; <sup>2</sup>Department of Pediatrics, Rostock University Medical Center, Rostock, Germany;

<sup>3</sup>Institute for Applied Computer Science, Karlsruhe Institute of Technology (KIT), Karlsruhe, Germany;

<sup>4</sup>Institute for Anatomy, University of Leipzig, Leipzig, Germany;

<sup>5</sup>Institute of Computer Science, University of Rostock, Rostock, Germany

<sup>6</sup>Department of Ophthalmology, Medical Faculty, Heinrich-Heine University, Düsseldorf, Germany

*Financial support:* This work has been supported by the German Research Foundation (Project VIES).

Conflict of Interest: No conflicting relationship exists for any author.

This article contains additional online-only material. The following should appear online-only: Tables S1 to S2

\*Corresponding author / Address for reprints:

Dagmar-C. Fischer, Department of Pediatrics, Rostock University Medical Center  
Ernst-Heydemann-Str. 8, 18057 Rostock, Germany

Tel:/Fax: +49 - 381 - 4 94 7041 / 70 44

e-Mail: [dagmar-christiane.fischer@med.uni-rostock.de](mailto:dagmar-christiane.fischer@med.uni-rostock.de)

**Supplement:**

**Table 1: Anthropometric and clinical characteristics of patients with respect to the mode of insulin therapy.**

Results are given as mean  $\pm$  standard deviation and median (min, max) for patients using MDII and CSI, respectively.

**Table 2: Results of the OCT in pediatric T1DM patients and healthy controls.**

Total retinal thickness as well as the thickness per retinal layer at the fovea together with the averaged thickness of the pericentral and peripheral areas are given as median and range.

|                                       | CSII<br>(5f / 7m)      | MDI<br>(6f / 10m)      | p     |
|---------------------------------------|------------------------|------------------------|-------|
| Age [year]                            | 13.2<br>(8.6 - 18.4)   | 15.0<br>(10.5 - 17.8)  | 0.302 |
| Absolute height [cm]                  | 164<br>(128 - 184)     | 165<br>(139 - 184)     | 0.982 |
| Standardized height [SDS]             | 0.45<br>(-0.83 - 2.16) | 0.20<br>(-1.59 - 0.96) | 0.037 |
| Absolute weight [kg]                  | 53.8<br>(28.3 - 79.8)  | 55.7<br>(33.2 - 83.0)  | 0.664 |
| Standardized weight [SDS]             | 0.27<br>(-0.94 - 2.00) | 0.07<br>(-1.38 - 2.27) | 0.397 |
| Absolute BMI [kg/m <sup>2</sup> ]     | 19.7<br>(15.7 - 27.9)  | 20.9<br>(17.2 - 28.4)  | 0.423 |
| Standardized BMI [SDS]                | 0.00<br>(-1.65 - 1.94) | 0.30<br>(-1.63 - 2.07) | 0.599 |
| Absolute BP <sub>sys</sub> [mmHg]     | 137<br>(105 - 148)     | 129<br>(113 - 166)     | 0.581 |
| Standardized BP <sub>sys</sub> [SDS]  | 2.40<br>(-0.49 - 3.56) | 1.59<br>(0.58 - 4.44)  | 0.548 |
| Absolute BP <sub>dias</sub> [mmHg]    | 77<br>(64 - 94)        | 71<br>(57 - 86)        | 0.083 |
| Standardized BP <sub>dias</sub> [SDS] | 1.21<br>(0.05 - 2.49)  | 0.70<br>(-0.87 - 1.76) | 0.075 |
| Duration of disease [years]           | 5.96<br>(1.2 - 13.1)   | 2.75<br>(1.2 - 15.5)   | 0.121 |
| Mean daily insulin dosage [IU/kg]     | 0.30<br>(0.19 - 0.78)  | 0.37<br>(0.20 - 0.66)  | 0.324 |
| Actual HbA1c [%]                      | 8.45<br>(6.9 - 9.9)    | 9.2<br>(4.6 - 14.8)    | 0.568 |
| Mean HbA1c [%]                        | 8.1<br>(6.8 - 11.3)    | 8.5<br>(6.7 - 12.7)    | 1     |

**Götze, von Keyserlingk et al, Supplemental Table 1**

|      | Thickness [ $\mu\text{m}$ ] | Patients              | Controls              | p     |
|------|-----------------------------|-----------------------|-----------------------|-------|
| ALL  | fovea                       | 276.2 (232.0 - 327.3) | 286.0 (244.0 - 319.0) | 0.275 |
|      | pericentral                 | 344.8 (302.9 - 368.7) | 348.2 (320.3 - 385.0) | 0.045 |
|      | peripheral                  | 308.2 (283.2 - 336.8) | 311.1 (282.6 - 334.9) | 0.189 |
| RNFL | fovea                       | 15.67 (11.00 - 23.67) | 15.33 (10.67 - 18.33) | 0.786 |
|      | pericentral                 | 23.79 (21.25 - 27.67) | 25.38 (21.83 - 29.08) | 0.022 |
|      | peripheral                  | 37.17 (30.75 - 42.33) | 39.42 (32.92 - 44.67) | 0.066 |
| GCL  | fovea                       | 17.83 (10.00 - 42.67) | 18.33 (11.00 - 28.00) | 0.506 |
|      | pericentral                 | 51.78 (44.25 - 60.50) | 53.46 (49.50 - 60.50) | 0.039 |
|      | peripheral                  | 37.63 (32.67 - 43.75) | 38.04 (32.67 - 44.58) | 0.582 |
| IPL  | fovea                       | 22.83 (17.67 - 38.33) | 23.00 (17.33 - 28.67) | 0.961 |
|      | pericentral                 | 42.13 (36.42 - 48.33) | 43.46 (39.50 - 46.25) | 0.137 |
|      | peripheral                  | 30.63 (26.00 - 36.25) | 31.58 (26.33 - 35.75) | 0.571 |
| INL  | fovea                       | 19.50 (12.67 - 32.67) | 18.17 (12.33 - 30.00) | 0.285 |
|      | pericentral                 | 41.29 (32.17 - 45.08) | 40.79 (35.92 - 46.58) | 0.850 |
|      | peripheral                  | 34.92 (31.50 - 39.58) | 34.83 (31.75 - 40.33) | 0.749 |
| OPL  | fovea                       | 26.67 (16.33 - 36.33) | 29.17 (18.67 - 38.00) | 0.445 |
|      | pericentral                 | 33.29 (28.42 - 40.50) | 33.25 (27.08 - 41.25) | 0.935 |
|      | peripheral                  | 27.42 (24.42 - 31.50) | 27.25 (25.08 - 31.17) | 0.730 |
| ONL  | fovea                       | 86.67 (66.67 - 104.0) | 89.67 (47.33 - 108.3) | 0.133 |
|      | pericentral                 | 67.38 854.67 - 89.50) | 71.29 (45.67 - 84.25) | 0.215 |
|      | peripheral                  | 59.79 (47.42 - 76.67) | 61.17 (40.42 - 70.25) | 0.341 |
| RPE  | fovea                       | 17.33 (12.67 - 20.33) | 17.67 (14.67 - 22.33) | 0.273 |
|      | pericentral                 | 14.38 (11.83 - 16.25) | 14.79 (13.08 - 16.83) | 0.349 |
|      | peripheral                  | 13.17 (11.25 - 15.33) | 13.38 (11.08 - 15.50) | 0.967 |
| PR   | fovea                       | 90.83 (80.67 - 96.33) | 92.67 (83.00 - 98.67) | 0.505 |
|      | pericentral                 | 82.38 (71.83 - 86.17) | 83.08 (78.58 - 87.00) | 0.139 |
|      | peripheral                  | 79.75 (74.75 - 81.92) | 80.21 (74.58 - 83.50) | 0.285 |
